# Supplementary material for: Human induced pluripotent stem cell-derived cardiomyocytes (iPSC-CMs) for modeling cardiac arrhythmias: strengths, challenges and potential solutions
Source: PubMed Central journal article supplement (PMC11424716; doi:10.3389/fphys.2024.1475152), 2024-09-12
Supplement: Table1.pdf [file Table1.pdf]

**Supplementary Table 1.** A list of foundational and recent studies utilizing patient-derived/human iPSC-CMs to uncover the functional role of cardiac ion channels and dyad proteins in eliciting arrhythmogenesis.

|                                                                                              | Condition | Study                      | Gene Variant           | Characteristics of mutant human iPSC-CMs compared to healthy controls                                                                                                                                                                                                                            |
|----------------------------------------------------------------------------------------------|-----------|----------------------------|------------------------|--------------------------------------------------------------------------------------------------------------------------------------------------------------------------------------------------------------------------------------------------------------------------------------------------|
| <b>Foundational studies on specific gene variant-induced iPSC-CM-based arrhythmia models</b> | BrS       | (Kosmidis et al., 2016)    | SCN5A<br>p.(Arg1638X)  | <ol style="list-style-type: none"> <li>1. Significantly reduced <math>V_{max}</math></li> <li>2. Reduced peak <math>I_{Na}</math> density</li> <li>3. Reduced cardiac AP upstroke velocity</li> </ol>                                                                                            |
|                                                                                              | CPVT      | (Fatima et al., 2011)      | RYR2<br>p.(Phe2483Ile) | <ol style="list-style-type: none"> <li>1. Increased DADs and arrhythmias when exposed to adrenergic agonists</li> <li>2. Higher amplitudes and longer durations of spontaneous local <math>Ca^{2+}</math> release events</li> </ol>                                                              |
|                                                                                              | LQTS      | (Moretti et al., 2010)     | KCNQ1<br>p.(Arg190Gln) | <ol style="list-style-type: none"> <li>1. Prolonged APD</li> <li>2. Reduction of <math>I_{Ks}</math></li> <li>3. Enhanced vulnerability to catecholamine-induced tachyarrhythmia, which is reduced with beta blockers</li> </ol>                                                                 |
|                                                                                              | SQTS      | (El-Battrawy et al., 2018) | KCNH2<br>p.(Asn588Lys) | <ol style="list-style-type: none"> <li>1. Shortened APD</li> <li>2. Increased <math>I_{Kr}</math> and hERG</li> </ol>                                                                                                                                                                            |
| <b>Expansion and optimization of gene-variant induced iPSC-CM-based arrhythmia models</b>    |           | (Selga et al., 2018)       | SCN5A<br>p.(Arg367His) | <ol style="list-style-type: none"> <li>1. Reduction in <math>I_{Na}</math> peak current density</li> <li>2. Accelerated recovery from Na channel inactivation</li> <li>4. Similar changes <math>I_{Na}</math> properties observed across different iPSC-CM differentiation procedures</li> </ol> |
|                                                                                              |           | (de la Roche et al., 2019) | SCN5A<br>p.(Ala735Val) | <ol style="list-style-type: none"> <li>1. Reduced cardiac AP upstroke velocity due to reduced <math>I_{Na}</math> inward</li> <li>2. Right shift of Na activation curve, prolonged recovery from inactivation</li> </ol>                                                                         |
|                                                                                              | BrS       | (Li et al., 2020)          | SCN5A<br>p.(Ser1812X)  | <ol style="list-style-type: none"> <li>1. Reduced peak <math>I_{Na}</math> density</li> <li>2. Irregular Nav1.5 localization and decreased colocalization of Nav1.5 and Cx43</li> <li>3. Reduced Nav1.5 expression</li> <li>4. Reduced cardiac AP upstroke velocity</li> </ol>                   |

|      |                         |                                          |                                                                                                                                                                                                                                                                                  |
|------|-------------------------|------------------------------------------|----------------------------------------------------------------------------------------------------------------------------------------------------------------------------------------------------------------------------------------------------------------------------------|
|      |                         |                                          | <p>5. Abnormal AP profile, including EADs and DADs</p> <p>6. First demonstration of conduction slowing in BrS-CMs</p>                                                                                                                                                            |
|      | (Lu et al., 2023)       | SCN5A<br>p.(Arg620His)+<br>p.(Arg811His) | <p>1. <math>I_{Na}</math> density reduced, lower NaV1.5</p> <p>2. Beating interval variation</p>                                                                                                                                                                                 |
|      | (Itzhaki et al., 2012)  | RYR2<br>p.(Met4109Arg)                   | <p>1. No observed difference in AP properties</p> <p>2. Increased occurrence of DADs</p> <p>3. Significant whole-cell <math>Ca^{2+}</math> transient abnormalities, which aggravated upon adrenergic stimulation but improved with <math>\beta</math>-blockers</p>               |
|      | (Novak et al., 2012)    | CASQ2<br>p.(Asp307His)                   | <p>1. Prolonged APD</p> <p>2. DADs and diastolic <math>Ca^{2+}</math> increase caused by <math>\beta</math>-adrenergic stimulation</p>                                                                                                                                           |
|      | (Zhang et al., 2013)    | RYR2<br>p.(Phe2483Ileu)                  | <p>1. Caffeine-induced <math>Ca^{2+}</math> transients produced smaller <math>I_{NCX}</math>, showing smaller <math>Ca^{2+}</math> stores</p> <p>2. Higher CICR gain</p> <p>3. Increased diastolic <math>Ca^{2+}</math> level and spontaneous <math>Ca^{2+}</math> release</p>   |
| CPVT | (Acimovic et al., 2018) | RYR2<br>p.(Asp3638Ala)                   | <p>1. Abnormal <math>Ca^{2+}</math> release under stress</p> <p>2. Decreased <math>Ca^{2+}</math> transient amplitude under stress</p> <p>3. Increase in systolic and diastolic aberrant <math>Ca^{2+}</math> events under stress</p> <p>4. Leaky RYR2 channels under stress</p> |
|      | (Itzhaki et al., 2011)  | KCNH2<br>p.(Ala614Val)                   | <p>1. Prolonged APD</p> <p>2. Reduction of <math>I_{Kr}</math> peak amplitudes at depolarization steps</p> <p>3. Development of EADs</p>                                                                                                                                         |
| LQTS | (Egashira et al., 2012) | KCNQ1<br>1893delC                        | <p>1. Prolonged Field potential duration (FPD)</p> <p>2. Treatment of LQTS-iPSC-CMs with isoproterenol induces ventricular tachycardia-</p>                                                                                                                                      |

|  |                         |                         |                                                                                                       |
|--|-------------------------|-------------------------|-------------------------------------------------------------------------------------------------------|
|  |                         |                         | like arrhythmia, which was blocked by $\beta$ -blocker                                                |
|  | (Ma et al., 2013, p. 3) | SCN5A<br>p.(Val1763Met) | 1. Increased late $I_{Na}$ and APD prolongation<br>2. Shortened $I_{Na}$ inactivation recovery        |
|  | (Malan et al., 2016)    | SCN5A<br>p.(Arg1644His) | 1. Prolonged APD<br>2. High incidence of EADs<br>3. Accelerated recovery from Na current inactivation |
|  | (Garg et al., 2018b)    | KCNH2<br>p.(Thr983Ile)  | 1. $I_{kr}$ density reduced<br>2. High diastolic $Ca^{2+}$                                            |
