# Supplementary material for: Human induced pluripotent stem cell-derived cardiomyocytes (iPSC-CMs) for modeling cardiac arrhythmias: strengths, challenges and potential solutions
Source: PubMed Central journal article supplement (PMC11424716; doi:10.3389/fphys.2024.1475152), 2024-09-12
Supplement: Table2.pdf [file Table2.pdf]

**Supplementary Table 2.** Comparison of the electrophysiological, morphological, ultrastructural, and metabolic characteristics of iPSC-CMs versus adult cardiomyocytes.

| Ion Channels, Currents             |                         | Genes that encode major pore-forming $\alpha$ -Subunit/s | Genes that encode minor $\beta$ -Subunit/s                                                                                                | Status of hiPSC-CM when compared to adult CM                                                       |                                                                                    | References                                    |
|------------------------------------|-------------------------|----------------------------------------------------------|-------------------------------------------------------------------------------------------------------------------------------------------|----------------------------------------------------------------------------------------------------|------------------------------------------------------------------------------------|-----------------------------------------------|
|                                    |                         | Nav1.5<br>$I_{Na}$ ( $I_{NaT}$ , $I_{NaL}$ )             | SCN5A                                                                                                                                     | SCN1B–<br>SCN4B                                                                                    | Lower functional availability of Na channels                                       |                                               |
| Cav1.2<br>$I_{CaL}$                | CACNA1C                 | CACNB2,<br>CACNG                                         | Robust expression of $I_{CaL}$ and similar properties                                                                                     |                                                                                                    | (Ma et al., 2011; Hofmann et al., 2014; Garg et al., 2018a)                        |                                               |
| Kv4.2, Kv4.3<br>$I_{to,f}$ (fast)  | KCND2, KCND3            | KCNE2-3,<br>KCNE1-2,<br>DPP6                             | Slightly lower functional expression with a slow recovery of outward current from inactivation.                                           |                                                                                                    | (Niwa and Nerbonne, 2010; Ma et al., 2011; Garg et al., 2018a)                     |                                               |
| Kv7.1<br>$I_{Ks}$ (slow)           | KCNQ1                   | KCNE1                                                    | Similar current densities                                                                                                                 |                                                                                                    | (Lee et al., 2000; Moretti et al., 2010; Garg et al., 2018a)                       |                                               |
| Kv11.1<br>$I_{Kr}$ (rapid)         | KCNH2 (hERG1)           |                                                          | Similar current densities                                                                                                                 |                                                                                                    | (Salama and London, 2007; Ma et al., 2011; Lahti et al., 2012; Garg et al., 2018a) |                                               |
| Kir2.1<br>(Kir2.2/2.3)<br>$I_{K1}$ | KCNJ2<br>(KCNJ12/KCNJ4) |                                                          | Lower $I_{K1}$ current density along with $I_f$ contributes to spontaneous beating and relatively depolarized resting membrane potential. |                                                                                                    | (Zaritsky et al., 2001; Ma et al., 2011; Garg et al., 2018a)                       |                                               |
| <b>Electrophysiology</b>           |                         |                                                          |                                                                                                                                           |                                                                                                    |                                                                                    |                                               |
| Conduction Velocity                |                         |                                                          | hiPSC-CMs<br>10–20 cm/s                                                                                                                   | Adult CMs<br>60 cm/s                                                                               |                                                                                    | (Denning et al., 2016; Herron, 2016)          |
| Gap Junctions                      |                         |                                                          | All over the cell membrane                                                                                                                | Intercalated discs                                                                                 |                                                                                    | (Wu et al., 2021)                             |
| Resting Membrane Potential         |                         |                                                          | –20 to –60 mV                                                                                                                             | –80 to –90 mV                                                                                      |                                                                                    | (Denning et al., 2016; Karbassi et al., 2020) |
| Ion Channel Activation             | <b>Channel</b>          | <b>Current</b>                                           |                                                                                                                                           |                                                                                                    |                                                                                    |                                               |
|                                    | Nav1.5                  | $I_{Na}$                                                 | – 38.7 ± 0.3 mV<br>[mid activation voltage]                                                                                               | Atrial CMs:<br>– 44.9 ± 0.5 mV<br>Ventricular CMs:<br>– 43.4 ± 0.4 mV<br>[mid activation voltages] |                                                                                    | (Goodrow et al., 2018)                        |

|                             |                    |            |                                                 |                                                                   |                                                     |
|-----------------------------|--------------------|------------|-------------------------------------------------|-------------------------------------------------------------------|-----------------------------------------------------|
|                             | Cav1.2             | $I_{CaL}$  | -50 mV                                          | Around -30 mV                                                     |                                                     |
|                             | Cav3.1, 3.2        | $I_{CaT}$  | -50 mV                                          | ~ -60 mV                                                          | (Grant, 2009; Uzun et al., 2016)                    |
|                             | Kir 2.1/2.2        | $I_{K1}$   | -50 mV                                          | ~ -40 mV                                                          | (Jeevaratnam et al., 2018)                          |
|                             | HERG               | $I_{Kr}$   | $-21 \pm 2$ mV [V $\frac{1}{2}$ ]               | -40 to -30 mV                                                     | (Grant, 2009; Altrocchi et al., 2020)               |
| Ion Channel Inactivation    |                    |            |                                                 |                                                                   |                                                     |
|                             | Nav1.5             | $I_{Na}$   | $-79.9 \pm 0.9$ mV                              | Atrial CM: $-82.5 \pm 0.1$ mV<br>Ventricle CM: $-74.4 \pm 0.2$ mV | (Goodrow et al., 2018)                              |
|                             | Cav1.2             | $I_{Ca-L}$ | -10 mV                                          | ~ -40 mV                                                          | (Grant, 2009; Uzun et al., 2016)                    |
|                             | Cav3.1, 3.2        | $I_{Ca-T}$ | -30 mV                                          | Hyperpolarized                                                    | (Grant, 2009; Uzun et al., 2016)                    |
|                             | HERG               | $I_{Kr}$   | -40 mV [V $\frac{1}{2}$ ]                       | +20 to +40 mV                                                     | (Altrocchi et al., 2020; Zequn and Jiangfang, 2021) |
| <b>Morphology</b>           |                    |            |                                                 |                                                                   |                                                     |
|                             | Size               |            | Smaller                                         | Larger                                                            | (Yang et al., 2014; Ahmed et al., 2020)             |
|                             | Shape              |            | Circular                                        | Rod-shaped                                                        | (Yang et al., 2014)                                 |
|                             | Nuclei             |            | Mononucleated (immature)                        | 25% multinucleated                                                | (Yang et al., 2014)                                 |
| <b>Ultrastructure</b>       |                    |            |                                                 |                                                                   |                                                     |
|                             | Mitochondria       |            | Long, slender, and lacks mitochondrial cristae. | Ovular shaped, occupy 20-40% of the cell volume                   | (Wu et al., 2021)                                   |
|                             | Sarcomere          |            | $1.85 \pm 0.046$ $\mu$ m                        | $1.91 \pm 0.01$ $\mu$ m                                           | (Lemcke et al., 2020)                               |
|                             | Z-line thickness   |            | $73.45 \pm 1.24$ nm                             | $74.6 \pm 1.85$ nm                                                | (Lemcke et al., 2020)                               |
|                             | T-tubule           |            | Absent                                          | Present                                                           | (Wu et al., 2021)                                   |
| <b>Myofibrillar Isoform</b> |                    |            |                                                 |                                                                   |                                                     |
|                             | Titin              |            | N2BA                                            | N2B                                                               | (Yang et al., 2014; Wu et al., 2021)                |
|                             | Myosin Heavy Chain |            | $\beta \approx \alpha$                          | $\beta \gg \alpha$                                                | (Yang et al., 2014; Wu et al., 2021)                |

|                   |  |  |  |                                                              |                                |                         |
|-------------------|--|--|--|--------------------------------------------------------------|--------------------------------|-------------------------|
| <b>Metabolism</b> |  |  |  | Mainly glycolysis for energy production in immature iPSC-CMs | Fatty acid/ $\beta$ -oxidation | (Vučković et al., 2022) |
|-------------------|--|--|--|--------------------------------------------------------------|--------------------------------|-------------------------|
